# Supplementary material
Source: publisher figshare collection journal article supplement (https://karger.figshare.com/ndownloader/files/9070819)
Supplement: Supplementary file 1 [file 9070819]

**Supplemental Figure 1.** **Effect on T877A-AR LNCaP and wtAR-VCaP cell viability after exposure to increasing concentrations of prednisolone (A), spironolactone (B) and eplerenone (C).**

**A**

**
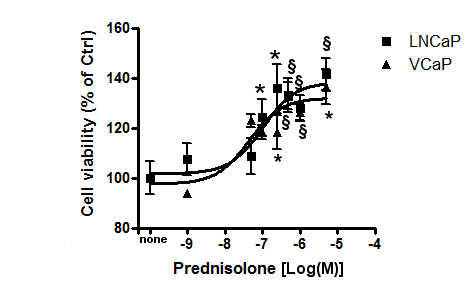
**

**B**

**
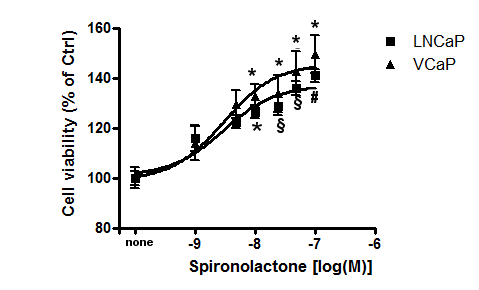
**

**C**

**
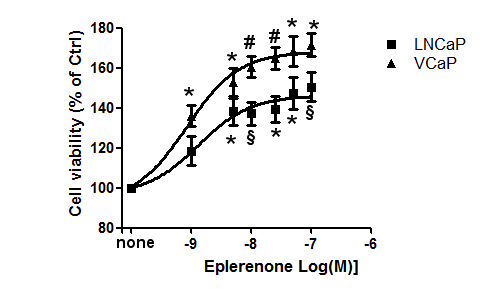
**

Cells were plated at the density of 1.5 x 104/well in 24 wells-plate and exposed to increasing concentrations of the different drugs, as described in Methods. Drug treatments were performed as described in Methods. Data are expressed as mean ± SEM of three experiments, each run in triplicate.

*p<0.05 vs control; § p<0.01 vs control, # p<0.001 vs control

**Supplemental Figure 2.** **Effect on T877A-AR LNCaP and wtAR-VCaP cell viability after exposure to increasing concentrations of dexametasone**


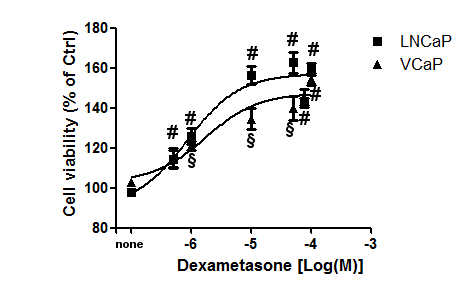


Cells were plated at the density of 1.5 x 104/well in 24 wells-plate and exposed to increasing concentrations (0.5 – 100 µM) of dexametasone, as described in Methods. Data are expressed as mean ± SEM of three experiments, each run in triplicate.

§ p<0.01 vs control, # p<0.001 vs control

**Supplemental Figure 3.** **Effect on PCa cell viability after exposure to increasing concentrations of amiloride**

Cells were plated at the density of 1.5 x 104/well in 24 wells-plate and exposed to increasing concentrations (0.01 - 25 µM) of amiloride, as described in Methods. Data are expressed as mean ± SEM of three experiments, each run in triplicate.

*p<0.05 vs control; § p<0.01 vs control
